# Supplementary material for: Novel NiPt alloy nanoparticle decorated 2D layered g-C3N4 nanosheets: a highly efficient catalyst for hydrogen generation from hydrous hydrazine
Source: Royal Society of Chemistry journal article supplement (doi:10.1039/c9ta01535c), 2019-01-01
Supplement: c9ta01535c1.pdf [file c9ta01535c1.pdf]

## Electronic Supplementary Information

### **Novel NiPt alloy nanoparticles decorated 2D layered g-C<sub>3</sub>N<sub>4</sub> Nanosheets: a highly efficient catalyst for hydrogen generation from hydrous hydrazine**

Chao Wan<sup>a,b,c</sup>, Lin Sun<sup>b</sup>, Lixin Xu<sup>b,c</sup>, Dang-guo Cheng<sup>\*a</sup>, Fengqiu Chen<sup>a</sup>, Xiaoli

Zhan<sup>a</sup>, Yongrong Yang<sup>a</sup>

<sup>a</sup> *Zhejiang Provincial Key Laboratory of Advanced Chemical Engineering Manufacture  
Technology, College of Chemical and Biological Engineering, Zhejiang University, 38 Zheda  
Road, Hangzhou 310027, China*

<sup>b</sup> *School of Chemistry and Chemical Engineering, Hexian Chemical Industrial Development  
Institute, Anhui University of Technology, 59 Hudong Road, Ma'anshan 243002, China*

<sup>c</sup> *Ahut Chemical Science & Technology Co.,Ltd, Ma'anshan 243002, China*

---

\* Corresponding author. Tel.: +86 571 87953382; Fax: +86 571 87951742.

E-mail address: dgcheng@zju.edu.cn (Dang-guo Cheng)

## 1. Chemical and Materials

Hydrazine monohydrate ( $\text{H}_2\text{NNH}_2 \cdot \text{H}_2\text{O}$ , 85%), sodium borohydride ( $\text{NaBH}_4$ , >96%), sodium hydroxide ( $\text{NaOH}$ , >96%) were obtained from Sinopharm Chemical Reagent Co., Ltd. Melamine ( $\text{C}_3\text{H}_6\text{N}_6$ , 99%), lithium chloride ( $\text{LiCl}$ , >98%) were purchased from Aladdin Industrial Inc., Chloroplatinic acid hexahydrate ( $\text{H}_2\text{PtCl}_6 \cdot 6\text{H}_2\text{O}$ , AR), nickel chloride hexahydrate ( $\text{NiCl}_2 \cdot 6\text{H}_2\text{O}$ , AR) were supplied by Nanjing Chemical Reagent Co., Ltd., All above-mentioned reagent were used without further purification. All solutions were prepared using De-ionized water as solvent, which was obtained by reversed osmosis with the specific resistance of  $18.2 \text{ M}\Omega \cdot \text{cm}$ .

## 2. Synthesis

### 2.1. Synthesis of g- $\text{C}_3\text{N}_4$ NSs

g- $\text{C}_3\text{N}_4$  NSs were fabricated by molten-salt assisted thermal poly-condensation method and subsequently water exfoliation method.<sup>S1</sup> Specifically, 2 g melamine and 10 g lithium chloride were mixed in the mortar, grounded sufficiently and transferred into 150 mL alumina crucible. The reaction mixture was calcined at  $380^\circ\text{C}$  for 2 hours at ramp rate  $6.7^\circ\text{C} \cdot \text{min}^{-1}$  and heated to  $550^\circ\text{C}$  for 4 hours at a same ramp rate. Afterwards the sample was cooled to room temperature at  $10^\circ\text{C} \cdot \text{minute}^{-1}$  and the g- $\text{C}_3\text{N}_4/\text{Li}^+\text{Cl}^-$  was obtained. 500 mg g- $\text{C}_3\text{N}_4/\text{Li}^+\text{Cl}^-$  was boiled under vigorously stirring and washed with deionized water. The dispersed suspension was centrifuged at 8000 rpm for 5 minutes to collect porous g- $\text{C}_3\text{N}_4$  NSs.<sup>S1</sup> For comparison, bulk-g- $\text{C}_3\text{N}_4$  was synthesized under exactly same condition without adding lithium chloride.

### 2.2. Synthesis of NiPt/g- $\text{C}_3\text{N}_4$ NSs catalysts

Typically, for preparation of  $\text{Ni}_{0.6}\text{Pt}_{0.4}/\text{g-}\text{C}_3\text{N}_4$  NSs, 5.0 mL of aqueous solution containing  $\text{NiCl}_2$  (0.24 mmol) and  $\text{H}_2\text{PtCl}_6$  (0.16 mmol) was added into the well dispersed g- $\text{C}_3\text{N}_4$  NSs

solution. After stirring for 24 h, a solution containing sodium borohydride ( $\text{NaBH}_4$ ) and sodium hydroxide ( $\text{NaOH}$ ) was added to the abovementioned mixture at 0 °C using an ice bath to maintain the temperature while stirring vigorously. The catalysts could be obtained by centrifugation, washing by ethanol and drying in the vacuum at 100 °C for 2 h.

For comparison, we further adjusted the molar ratio of Ni to Pt in the NiPt bimetallic alloy, and prepared a series of samples, including Ni/g- $\text{C}_3\text{N}_4$  NSs,  $\text{Ni}_{0.2}\text{Pt}_{0.8}$ /g- $\text{C}_3\text{N}_4$  NSs,  $\text{Ni}_{0.4}\text{Pt}_{0.6}$ /g- $\text{C}_3\text{N}_4$  NSs,  $\text{Ni}_{0.8}\text{Pt}_{0.2}$ /g- $\text{C}_3\text{N}_4$  NSs, and Pt/g- $\text{C}_3\text{N}_4$  NSs.

### **3. Characterization**

Powder X-ray diffraction (XRD) patterns were measured by a Bruker D8-Advance X-ray diffractometer using Cu K $\alpha$  radiation source ( $\lambda = 0.154178$  nm) with a velocity of 10° min<sup>-1</sup>. The morphologies and sizes of the samples were observed by using a FEI Tecnai F20 at an acceleration voltage of 200 kV. Scanning electron microscopy (SEM) images were obtained using a Zeiss SIGMA microscope. X-ray photoelectron spectroscopy (XPS) measurement was performed with a Thermo Fischer ESCALAB 250Xi spectrophotometer. The composition of the collected gases were detected by using a Hiden QIC-20 quadruple mass spectrometer under Ar atmosphere. Inductively coupled plasma-atomic emission spectroscopy (ICP-AES) was performed on Thermo iCAP6300 to measure the composition of the catalysts. The characterization of Brunauer–Emmett–Teller (BET) surface data, which was based on  $\text{N}_2$  adsorption/desorption isotherms at 77 K and controlled by liquid nitrogen, was measured using a Micromeritics ASAP2020.

### **4. Catalytic dehydrogenation tests**

The catalytic dehydrogenation tests were performed in a two-necked round-bottom flask. The volume of the evolved gas was monitored by recording the displacement of water in the gas

burette (Fig.S1). The reaction was completed when there was no more gas generation. Specifically, 100 mg NiPt/g-C<sub>3</sub>N<sub>4</sub> NSs catalyst and 80 mg NaOH solid was added into a two-neck bottle containing 2 mL water with magnetic stirring, where one neck was connected to a gas burette to monitor the volume of the released gas, and the other one was used to introduce 2 mL water containing 0.1 mL N<sub>2</sub>H<sub>4</sub>•H<sub>2</sub>O (1.96 mmol) with a syringe. The gas released during the decomposition was passed through HCl solution (5.0 M) before being measured volumetrically. The hydrogen selectivity (X) can be calculated using eqn (1).

$$X = (3\lambda - 1) / 8 [\lambda = n(\text{H}_2 + \text{N}_2) / n(\text{N}_2\text{H}_4 \cdot \text{H}_2\text{O})] \quad (1)$$

The TOF reported here is an apparent TOF value based on the number of (Ni+Pt) atoms in the catalysts, which is calculated from the equation as follows:

$$TOF = \frac{P_{atm} V_{H_2} / RT}{n_{Ni+Pt} t} \quad (2)$$

whereas, P<sub>atm</sub> is the atmospheric pressure (101325 Pa), V<sub>H<sub>2</sub></sub> is the volume of generated H<sub>2</sub> gas at the time of half-completion of reaction, R is the universal gas constant (8.3145 m<sup>3</sup> Pa mol<sup>-1</sup> K<sup>-1</sup>), T is the reaction temperature (303-333 K), n<sub>Ni+Pt</sub> is the total number of moles of (Ni+Pt) atoms in the catalyst and t is the time in hour for half-completion of reaction.

To investigate the effect of alkaline, the decomposition of hydrous hydrazine was conducted in present of different concentrations of NaOH, respectively.

To obtain the activation energy (E<sub>a</sub>), the reaction temperatures for the catalytic decomposition were varied from 303 K to 333 K.

For the durability tests, catalytic reactions were repeated 5 times by adding another equivalent of hydrous hydrazine (1.96 mmol) into the mixture after the previous runs.

## 5. Figures

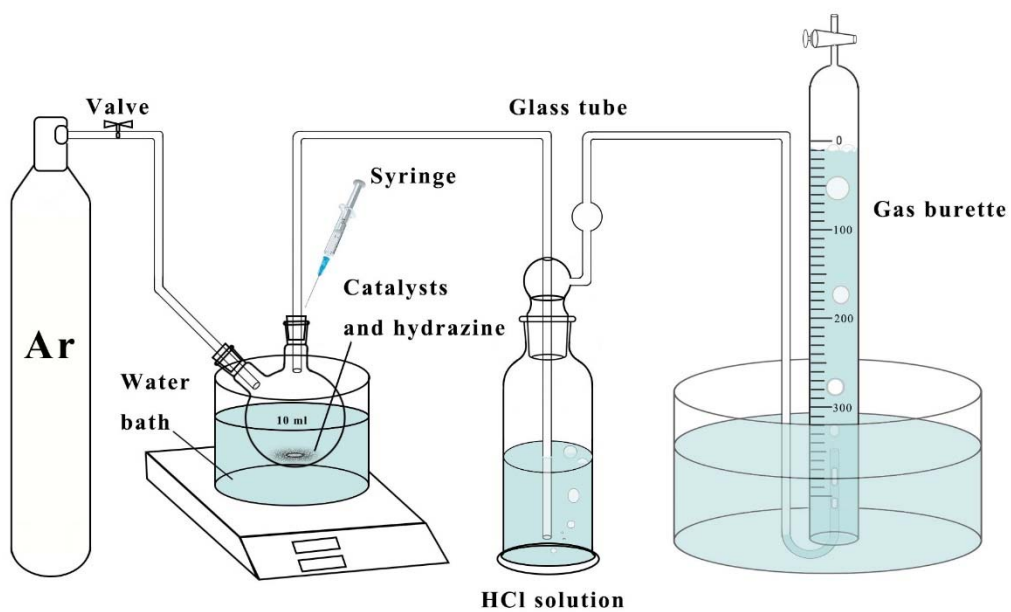

**Fig. S1** The detailed experimental setup for dehydrogenation reaction

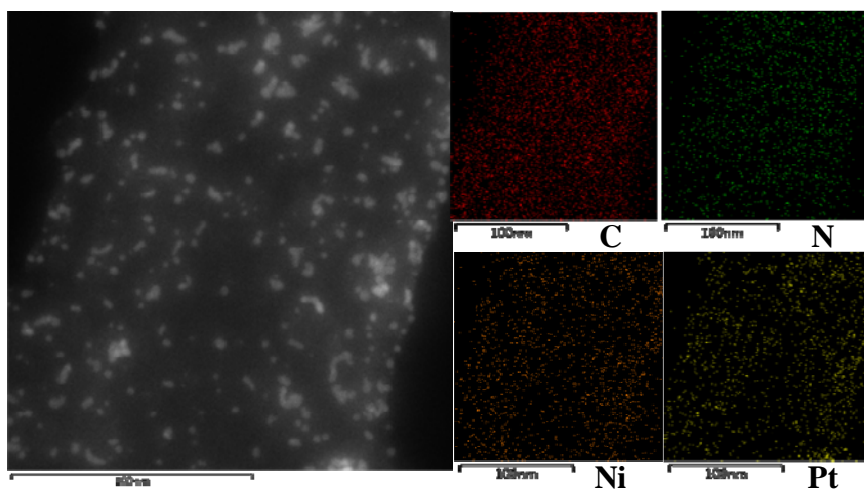

**Fig. S2** The HAADF-STEM image for  $\text{Ni}_{0.6}\text{Pt}_{0.4}/\text{g-C}_3\text{N}_4$  NSs (left); The EDX elemental mapping of the  $\text{Ni}_{0.6}\text{Pt}_{0.4}/\text{g-C}_3\text{N}_4$  NSs (right).

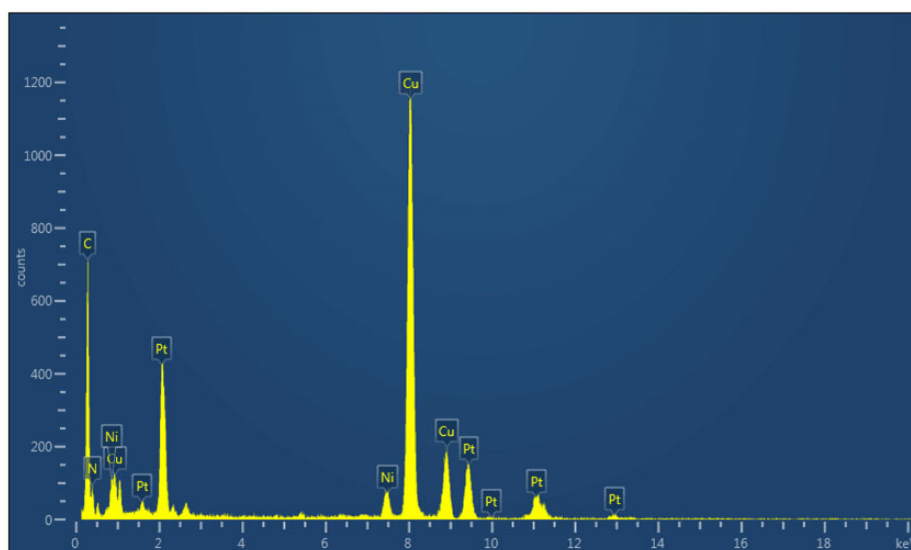

Fig. S3 EDX pattern of  $\text{Ni}_{0.6}\text{Pt}_{0.4}/\text{g-C}_3\text{N}_4$  NSs.

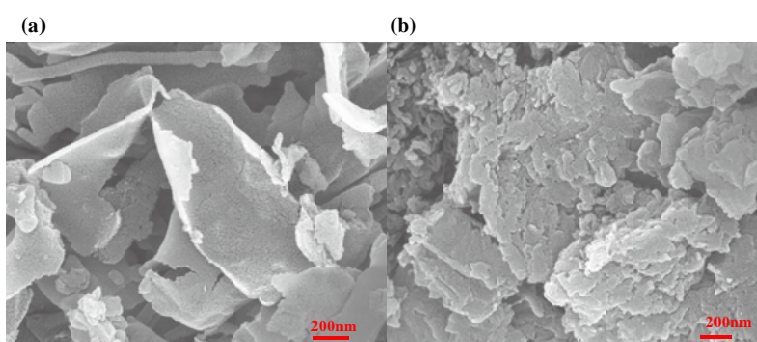

**Fig. S4** SEM image of (a)  $\text{Ni}_{0.6}\text{Pt}_{0.4}/\text{g-C}_3\text{N}_4$  NSs and (b)  $\text{Ni}_{0.6}\text{Pt}_{0.4}/\text{g-C}_3\text{N}_4$ .

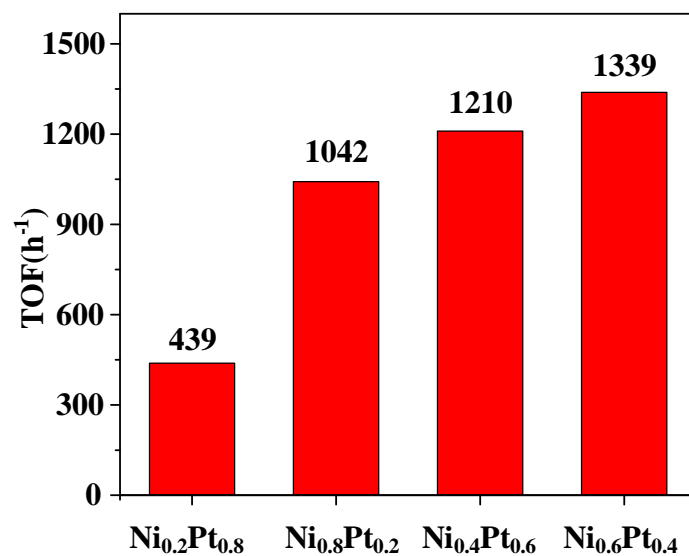

**Fig. S5** Corresponding TOF values for the dehydrogenation of hydrazine monohydrate over NiPt/g-C<sub>3</sub>N<sub>4</sub> NSs with different molar ratio of Ni-Pt alloy at 323 K ( $c_{\text{NaOH}}=0.5$  M,  $n_{\text{metal}}:n_{\text{N}_2\text{H}_4\cdot\text{H}_2\text{O}}=0.05$ )

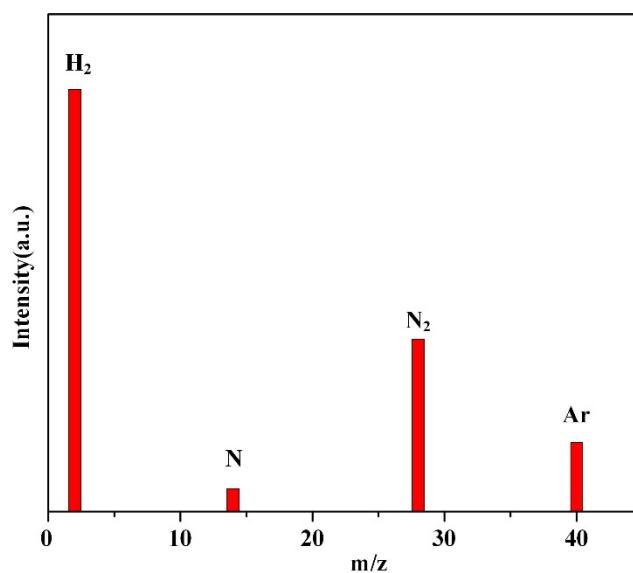

**Fig. S6** MS profile for the gases released from the decomposition of hydrazine hydrate in aqueous NaOH solution (0.75 M) over Ni<sub>0.6</sub>Pt<sub>0.4</sub>/g-C<sub>3</sub>N<sub>4</sub> NSs at 323 K under an argon atmosphere

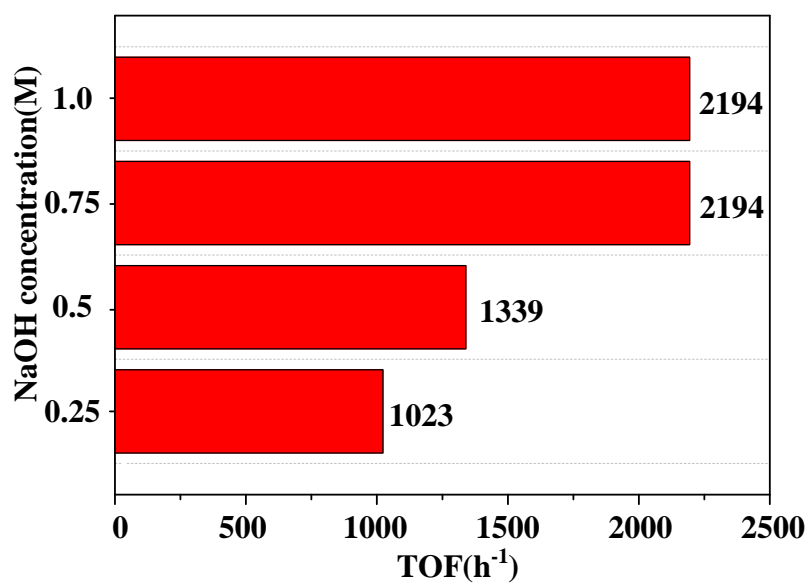

**Fig. S7** Corresponding TOF values for the dehydrogenation of hydrazine monohydrate over  $\text{Ni}_{0.6}\text{Pt}_{0.4}/\text{g-C}_3\text{N}_4$  NSs with different concentrations of NaOH at 323 K ( $n_{\text{metal}}:n_{\text{N}_2\text{H}_4\cdot\text{H}_2\text{O}}=0.05$ )

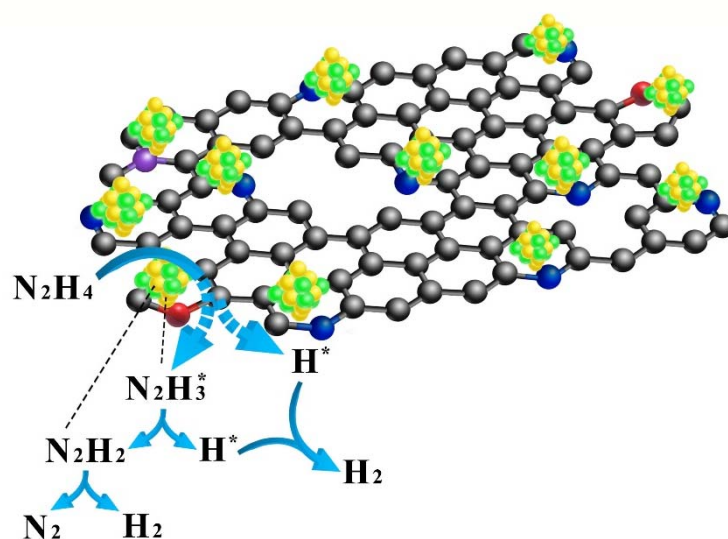

**Fig. S8** The possible mechanism for decomposition of hydrazine catalysed by  $\text{Ni}_{0.6}\text{Pt}_{0.4}/\text{g-C}_3\text{N}_4$  NSs

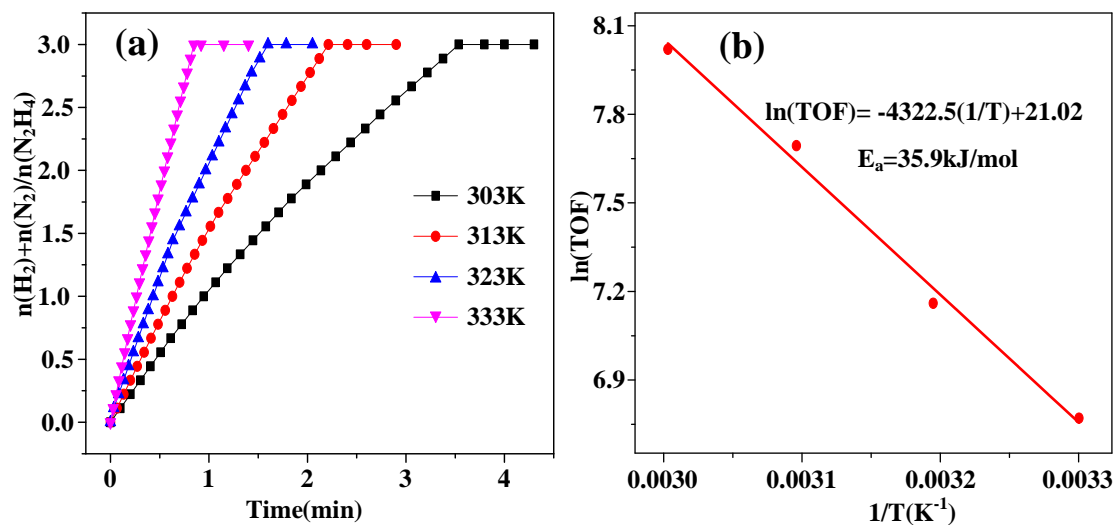

**Fig. S9** (a) Time course plots for hydrogen generation from the decomposition of hydrazine by  $\text{Ni}_{0.6}\text{Pt}_{0.4}/\text{g-C}_3\text{N}_4$  NSs at 303 K, 313 K, 323 K and 333K. (b) Plot of  $\ln k$  versus  $1/T$  during the hydrazine decomposition over  $\text{Ni}_{0.6}\text{Pt}_{0.4}/\text{g-C}_3\text{N}_4$  NSs at different temperatures.

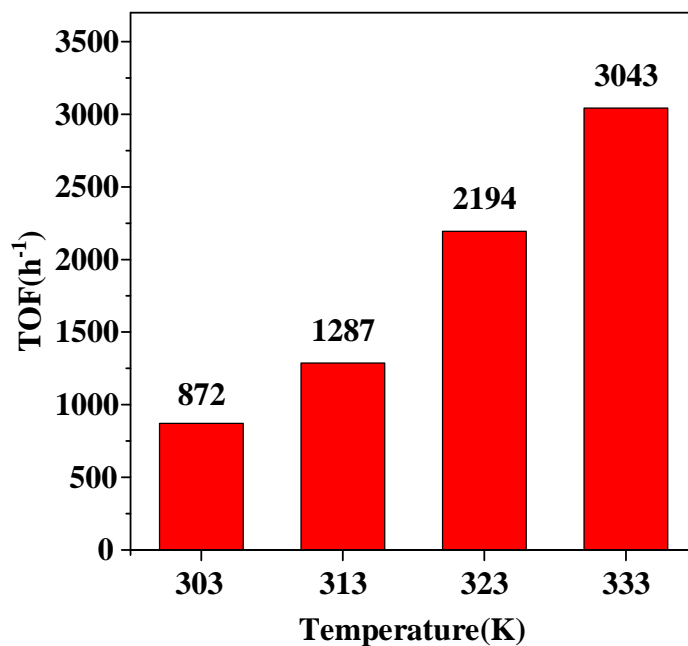

**Fig. S10** Corresponding TOF values for the dehydrogenation of hydrazine monohydrate over  $\text{Ni}_{0.6}\text{Pt}_{0.4}/\text{g-C}_3\text{N}_4$  NSs at different temperatures ( $c_{\text{NaOH}} = 0.75 \text{ M}$ ,  $n_{\text{metal}}:n_{\text{N}_2\text{H}_4 \cdot \text{H}_2\text{O}} = 0.05$ )

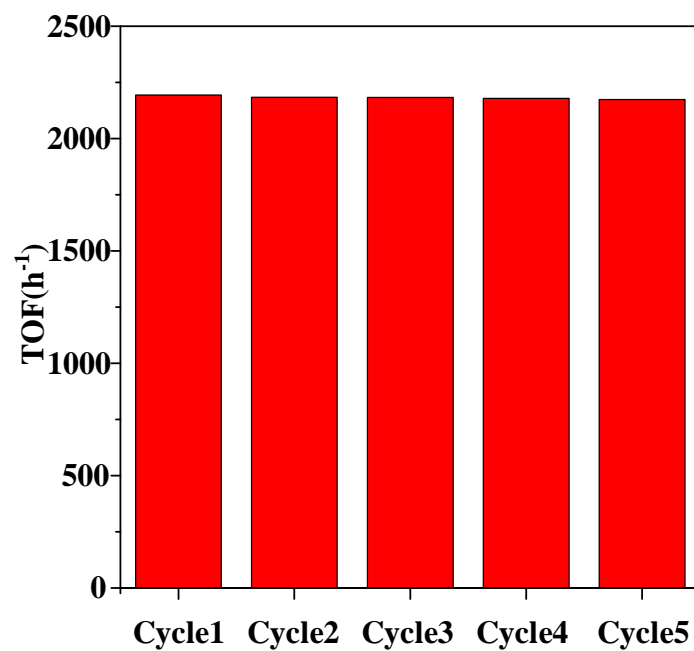

**Fig. S11** Corresponding TOF values for the durability of hydrogen generation from hydrazine monohydrate over Ni<sub>0.6</sub>Pt<sub>0.4</sub>/g-C<sub>3</sub>N<sub>4</sub> NSs ((c<sub>NaOH</sub>=0.75 M, n<sub>metal</sub>:n<sub>N<sub>2</sub>H<sub>4</sub>•H<sub>2</sub>O</sub>=0.05)

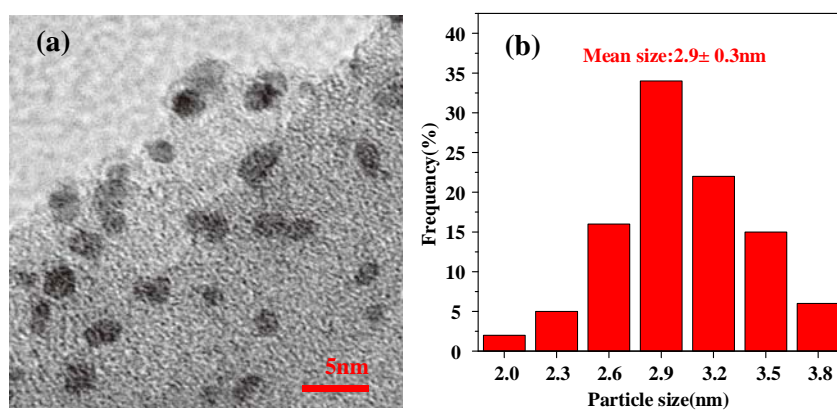

**Fig. S12** (a) TEM images and (b) the corresponding size histogram of NiPt NPs in

Ni<sub>0.6</sub>Pt<sub>0.4</sub>/g-C<sub>3</sub>N<sub>4</sub> NSs after 5 cycles.

## 6. Tables

**Table S1.** BET surface areas and pore volumes for the prepared samples.

| Sample                                                               | $S_{\text{BET}}$ ( $\text{m}^2 \text{g}^{-1}$ ) | Pore volume ( $\text{cm}^3 \text{g}^{-1}$ ) |
|----------------------------------------------------------------------|-------------------------------------------------|---------------------------------------------|
| $\text{Ni}_{0.6}\text{Pt}_{0.4}/\text{g-C}_3\text{N}_4$ NSs          | 129.8                                           | 0.151                                       |
| $\text{Ni}_{0.6}\text{Pt}_{0.4}/\text{g-C}_3\text{N}_4$ NSs–recycled | 121.6                                           | 0.147                                       |
| $\text{Ni}_{0.6}\text{Pt}_{0.4}/\text{g-C}_3\text{N}_4$              | 10.9                                            | 0.031                                       |

**Table S2.** ICP-AES results of Ni-Pt catalysts

| Catalyst                                                                | Ni<br>(wt%) | Pt<br>(wt%) | Ni-Pt initial<br>composition<br>(molar ratio) | Ni-Pt final<br>composition<br>(molar ratio) | Final<br>Metals/Catalyst<br>(mmol/100 mg) |
|-------------------------------------------------------------------------|-------------|-------------|-----------------------------------------------|---------------------------------------------|-------------------------------------------|
| $\text{Ni}_{0.2}\text{Pt}_{0.8}/\text{g-C}_3\text{N}_4$<br>NSs          | 1.2         | 13.3        | 20:80                                         | 23:77                                       | 0.106                                     |
| $\text{Ni}_{0.4}\text{Pt}_{0.6}/\text{g-C}_3\text{N}_4$<br>NSs          | 2.2         | 11.7        | 40:60                                         | 38:62                                       | 0.112                                     |
| $\text{Ni}_{0.6}\text{Pt}_{0.4}/\text{g-C}_3\text{N}_4$<br>NSs          | 3.7         | 7.9         | 60:40                                         | 61:39                                       | 0.118                                     |
| $\text{Ni}_{0.6}\text{Pt}_{0.4}/\text{g-C}_3\text{N}_4$<br>NSs–recycled | 3.6         | 8.4         | 60:40                                         | 59:41                                       | 0.119                                     |
| $\text{Ni}_{0.8}\text{Pt}_{0.2}/\text{g-C}_3\text{N}_4$<br>NSs          | 4.5         | 4.0         | 80:20                                         | 79:21                                       | 0.107                                     |
| $\text{Ni}_{0.6}\text{Pt}_{0.4}/\text{g-C}_3\text{N}_4$                 | 3.6         | 8.8         | 60:40                                         | 58:42                                       | 0.122                                     |

**Table S3.** Catalytic activity of Ni<sub>0.6</sub>Pt<sub>0.4</sub>/g-C<sub>3</sub>N<sub>4</sub> NSs toward dehydrogenation of hydrazine compared to other reported catalysts.

| Catalyst                                                                           | Solvent Medium   | Temp (K) | Selectivity for H <sub>2</sub> (%) | TOF (h <sup>-1</sup> ) | Ea(KJ mol <sup>-1</sup> ) | Reference    |
|------------------------------------------------------------------------------------|------------------|----------|------------------------------------|------------------------|---------------------------|--------------|
| Ni <sub>0.6</sub> Pt <sub>0.4</sub> /g-C <sub>3</sub> N <sub>4</sub> NSs           | Aqueous NaOH     | 323      | 100                                | 2194                   | 35.9                      | Present work |
| Pt <sub>0.6</sub> Ni <sub>0.4</sub> /PDA-rGO                                       | Aqueous NaOH     | 323      | 100                                | 2056                   | 33.9                      | S2           |
| Pt <sub>0.5</sub> Ni <sub>0.5</sub> /NGNs-850                                      | Aqueous NaOH     | 323      | 100                                | 2116                   | 32.28                     | S3           |
| (Ni <sub>3</sub> Pt <sub>7</sub> ) <sub>0.5</sub> - (MnOx) <sub>0.5</sub> /NPC-900 | Aqueous NaOH     | 323      | 100                                | 706                    | 50.15                     | S4           |
| Ni <sub>3</sub> Pt <sub>7</sub> /rGO                                               | Aqueous NaOH     | 323      | 100                                | 416                    | 49.36                     | S5           |
| Ni <sub>84</sub> Pt <sub>16</sub> /graphene                                        | Aqueous NaOH     | 323      | 100                                | 415                    | 40.4                      | S6           |
| Ni <sub>88</sub> Pt <sub>12</sub> @MIL-101                                         | Aqueous NaOH     | 323      | 100                                | 350                    | 50.5                      | S7           |
| Ni <sub>80</sub> Pt <sub>20</sub> @ZIF-8                                           | Aqueous NaOH     | 323      | 100                                | 90                     | -                         | S8           |
| Ni@Ni-Pt/La <sub>2</sub> O <sub>3</sub>                                            | Aqueous NaOH     | 323      | 100                                | 156                    | 56.2                      | S9           |
| Pt <sub>60</sub> Ni <sub>40</sub> -CNDs                                            | Aqueous NaOH     | 323      | 100                                | 170                    | 43.9                      | S10          |
| PtNi/C                                                                             | Aqueous NaOH     | 323      | 100                                | 210                    | 55.3                      | S11          |
| Ni <sub>0.9</sub> Pt <sub>0.1</sub> /Ce <sub>2</sub> O <sub>3</sub>                | Aqueous NaOH     | 298      | 100                                | 28.1                   | 42.3                      | S12          |
| RhNiP/rGO                                                                          | Aqueous NaOH     | 323      | 100                                | 471                    | 40.4                      | S13          |
| Ni <sub>0.6</sub> Fe <sub>0.4</sub> B                                              | Aqueous NaOH     | 323      | 100                                | 28.8                   | 50.7                      | S14          |
| Ni <sub>6</sub> Pt <sub>4</sub> -SF                                                | Aqueous NaOH     | 298      | 100                                | 150                    | -                         | S15          |
| NiPt <sub>0.057</sub> /Al <sub>2</sub> O <sub>3</sub> -HT                          | Without additive | 303      | 97                                 | 16.5                   | 34                        | S16          |
| Rh <sub>4.4</sub> Ni/graphene                                                      | Aqueous NaOH     | 298      | 100                                | 28                     | -                         | S17          |
| Ni <sub>3</sub> Fe/C                                                               | Without additive | 293      | 100                                | 528                    | 48.1                      | S18          |
| NiIr <sub>0.059</sub> /Al <sub>2</sub> O <sub>3</sub> -HT                          | Without additive | 303      | 99                                 | 12.4                   | 49.3                      | S19          |
| Ni <sub>1.5</sub> Fe <sub>1.0</sub> /(MgO) <sub>3.5</sub>                          | Without additive | 299      | 99                                 | 11                     | -                         | S20          |
| Rh                                                                                 | Without additive | 298      | 43.8                               | 2.5                    | -                         | S21          |
| Rh <sub>4</sub> Ni                                                                 | Without additive | 298      | 100                                | 4.8                    | -                         | S22          |
| Ni <sub>0.95</sub> Ir <sub>0.05</sub>                                              | Without additive | 298      | 100                                | 2.2                    | -                         | S23          |

## References

- (S1) L.T. Ma, H. Q. Fan, J. Wang, Y. W. Zhao, H. L. Tian, G. Z. Dong, *Appl. Catal. B: Environ.*, 2016, **190**, 93–102.
- (S2) F.-Z. Song, Q.-L. Zhu and Q. Xu, *J. Mater. Chem. A*, 2015, **3**, 23090.
- (S3) A. Kumar, X. C. Yang and Q. Xu, *J. Mater. Chem. A*, 2019, **7**, 112–115.
- (S4) B. Xia, T. Liu, W. Luo and G. Cheng, *J. Mater. Chem. A*, 2016, **4**, 5616.
- (S5) N. Cao, L. Yang, C. Du, J. Su, W. Luo and G. Cheng, *J. Mater. Chem. A*, 2014, **2**, 14344.
- (S6) Y. Du, J. Su, W. Luo and G. Cheng, *ACS Appl. Mater. Interfaces*, 2015, **7**, 1031.
- (S7) N. Cao, J. Su, W. Luo and G. Z. Cheng, *Int. J. Hydrogen Energy*, 2014, **39**, 9726.
- (S8) A. K. Singh and Q. Xu, *ChemCatChem*, 2013, **5**, 3000.
- (S9) Y.-J. Zhong, H.-B. Dai, Y.-Y. Jiang, D.-M. Chen, M. Zhu, L.-X. Sun, P. Wang, *J. Power Sources*, 2015, **300**, 294.
- (S10) J. K. Sun and Q. Xu, *ChemCatChem*, 2015, **7**, 526.
- (S11) S. N. Oliaee, C. Zhang, S. Y. Hwang, H. M. Cheung and Z. Peng, *J. Phys. Chem. C*, 2016, **120**, 9764.
- (S12) H. L. Wang, J. M. Yan, W. L. Wang, O. Song-Il and Q. Jiang, *J. Mater. Chem. A.*, 2013, **1**, 14957.
- (S13) X. Du, S. Tan, P. Cai, W. Luo, G. Cheng, *J. Mater. Chem. A*, 2016, **4**, 14572.
- (S14) H. L. Wang, J. M. Yan, S. J. Li, X. W. Zhang and Q. Jiang, *J. Mater. Chem. A.*, 2015, **3**, 121.
- (S15) A. K. Singh and Q. Xu, *Int. J. Hydrog. Energy*, 2014, **39**, 9128.
- (S16) L. He, Y. Q. Huang, A. Q. Wang, Y. Liu, X. Y. Liu, X. W. Chen, J. J. Delgado, X. D. Wang and T. Zhang, *J. Catal.*, 2013, **298**, 1–9.
- (S17) J. Wang, X. B. Zhang, Z. L. Wang and Y. Zhang, *Energy Environ. Sci.*, 2012, **5**, 6885.
- (S18) D. G. Tong, D. M. Tang, W. Chu, G. F. Gu and P. Wu, *J. Mater. Chem. A.*, 2013, **1**, 6425.
- (S19) L. He, Y. Huang, X. Liu, L. Lin, A. Wang, X. Wang, C. Y. Mou and T. Zhang, *Appl. Catal. B*, 2014, **147**, 779.
- (S20) W. Gao, C. Li, H. Chen, M. Wu, S. He, M. Wei, D. Evans and X. Duan, *Green Chem.* 2014, **16**, 1560.
- (S21) S. K. Singh, X. B. Zhang and Q. Xu, *J. Am. Chem. Soc.*, 2009, **131**, 9894.
- (S22) S. K. Singh and Q. Xu, *J. Am. Chem. Soc.*, 2009, **131**, 18032.
- (S23) S. K. Singh and Q. Xu, *Chem. Commun.*, 2010, **46**, 6545
